# Supplementary material for: Psychological Distress and Zika, Dengue and Chikungunya Symptoms Following the 2016 Earthquake in Bahía de Caráquez, Ecuador
Source: Int J Environ Res Public Health. 2017 Dec 5;14(12):1516. doi: 10.3390/ijerph14121516 (PMC5750934; doi:10.3390/ijerph14121516)
Supplement: Supplementary file 1 [file ijerph-14-01516-s001.pdf]

**Supplementary Table S1.** The frequency and prevalence of chronic health conditions reported by study site.

| <b>Chronic Condition</b>               | <b>Jorge Lomas<br/>N = 86</b> | <b>Pajonal<br/>N = 70</b> | <b>La Merced<br/>N = 171</b> | <b>Bella Vista<br/>N = 274</b> | <b>Total<br/>N = 601</b> | <b>P-value</b> |
|----------------------------------------|-------------------------------|---------------------------|------------------------------|--------------------------------|--------------------------|----------------|
| Hypertension                           | 8 (9.3%)                      | 5 (7.1%)                  | 18 (10.5%)                   | 21/273 (7.59%)                 | 52/600 (8.67%)           | 0.724          |
| Diabetes                               | 3 (3.5%)                      | 2 (2.9%)                  | 15 (8.8%)                    | 13 (4.7%)                      | 33 (5.5%)                | 0.142          |
| Heart attack                           | 0 (0%)                        | 0 (0%)                    | 4 (2.3%)                     | 9 (3.3%)                       | 13 (2.2%)                | 0.164          |
| Respiratory illness                    | 0 (0%)                        | 0 (0%)                    | 0 (0%)                       | 1 (0.4%)                       | 1 (0.2%)                 | 0.754          |
| Cancer, any                            | 0 (0%)                        | 0 (0%)                    | 0 (0%)                       | 0 (0%)                         | 0 (0%)                   | N/A            |
| Brain tumor                            | 0 (0%)                        | 0 (0%)                    | 3 (1.8%)                     | 0 (0%)                         | 3 (0.5%)                 | 0.056          |
| Serious brain injury                   | 0 (0%)                        | 0 (0%)                    | 0 (0%)                       | 1 (0.4%)                       | 1 (0.2%)                 | 0.754          |
| Malformation of brain<br>venous artery | 0 (0%)                        | 0 (0%)                    | 0 (0%)                       | 1 (0.4%)                       | 1 (0.2%)                 | 0.754          |
| Aneurism of thorax or<br>abdomen       | 0 (0%)                        | 3 (4.3%)                  | 5 (2.9%)                     | 17 (6.2%)                      | 25 (4.2%)                | 0.064          |
| Other chronic illness                  | 4 (4.7%)                      | 6 (8.6%)                  | 2(1.2%)                      | 11/270 (4.1)                   | 23/597 (3.9%)            | 0.052          |
| Any chronic condition                  | 13 (15.2%)                    | 13 (18.6%)                | 36 (21.0%)                   | 54/270 (20.0%)                 | 116/601 (19.3%)          | 0.716          |
|                                        | Range = 0–2                   | Range = 0–3               | Range = 0–4                  | Range = 0–4                    | Range = 0–4              |                |
| Number of chronic<br>conditions        | Median = 0                    | Median = 0                | Median = 0                   | Median = 0                     | Median = 0               |                |
|                                        | Mean = 0.17                   | Mean = 0.23               | Mean = 0.27                  | Mean = 0.27                    | Mean = 0.25              |                |
|                                        | SD = 2.56                     | SD = 2.91                 | SD = 2.70                    | SD = 0.61                      | SD = 0.58                |                |
